# Supplementary material for: Nitrogen-rich MOF derived porous Co3O4/N–C composites with superior performance in lithium-ion batteries
Source: Royal Society of Chemistry journal article supplement (doi:10.1039/c6ta05096d), 2016-01-01
Supplement: c6ta05096d1.pdf [file c6ta05096d1.pdf]

## Electronic Supplementary Information

# **Nitrogen-rich MOF Derived Porous Co<sub>3</sub>O<sub>4</sub>/N-C Composite with Superior Performance in Lithium-Ion Batteries**

Xiao Han,<sup>a,†</sup> Wen-Miao Chen,<sup>b,†</sup> Xiguang Han,<sup>\* a</sup> Yuan-Zhi Tan,<sup>c</sup> Di Sun<sup>\* b</sup>

<sup>a</sup>*Jiangsu Key Laboratory of Green Synthetic Chemistry for Functional Materials, Department of Chemistry, School of Chemistry and Chemical Engineering, Jiangsu Normal University, Xuzhou, 221116 (P. R. China). E-mail: xghan@jsnu.edu.cn.*

<sup>b</sup>*Key Lab of Colloid and Interface Chemistry, Ministry of Education, School of Chemistry and Chemical Engineering, Shandong University, Jinan, 250100, P. R. China.. E-mail: dsun@sdu.edu.cn*

<sup>c</sup>*State Key Laboratory for Physical Chemistry of Solid Surfaces and Department of Chemistry, College of Chemistry and Chemical Engineering, Xiamen University, Xiamen 361005, People's Republic of China.*

<sup>†</sup>These authors contributed equally.

---

## 1. Experiment Section

### 1.1 Regents and equipment

All starting materials were purchased from Sigma-Aldrich and used without any purification. The composition and phase of the as-prepared products were acquired by the powder X-ray diffraction (XRD) pattern using a Bruker D8 diffractometer with CuK $\alpha$  radiation ( $\lambda=1.5418 \text{ \AA}$ ) at room temperature. The morphology and crystal structure of as-prepared products were observed by scanning electron microscopy (Hitachi SU-8010 field emission SEM), and transmission electron microscopy (FEI Tecnai G20). All TEM samples were prepared by depositing a drop of diluted suspensions in ethanol on a carbon film coated copper grid. Thermogravimetric analysis (TGA) was carried on a TGA-Q500 thermoanalyzer with a heating rate of 10 °C/min under nitrogen atmosphere. The gas sorption isotherms were measured on an autosorp-IQ instrument from Quantachrome Instruments Corporation (Boynton Beach, Florida USA).

### 1.2 Synthesis of N-rich MOFs

In a typical synthesis, A mixture of Co(OAc) $_2\cdot 4\text{H}_2\text{O}$  (24.9 mg, 0.1 mmol), diimpym (21.8 mg, 0.1 mmol), and H $_2$ npta (21.1g, 0.1 mmol) were placed into a 25 mL Teflon reactor in the presence of 2 mL methanol-water ( $v:v = 1:1$ ) and 50  $\mu\text{L}$  0.1 M NaOH, which was sealed and heated to 120 °C. The temperature was held for 3000 mins, and then the reactant mixture was cooled at a rate of 0.1 °C min $^{-1}$  to room temperature, forming prismatic black crystals of **1** (yield, 70%). IR (solid KBr pellet):  $\nu = 3121$  (w), 1626 (m), 1585 (s), 1533(m), 1484 (m), 1348 (m), 1330 (m), 1313 (m), 1274 (w), 1231 (m), 1142 (w), 1102 (w), 1063 (s), 992 (m), 939 (w), 917 (w), 860 (m), 786 (m), 728 (s), 646 (s), 614 (m), 543 (w), 518 (w), 486 (m) cm $^{-1}$ . Elemental analysis calcd (%) for C $_{18}$ H $_{11}$ CoN $_7$ O $_6$ : C 45.02, H 2.31, N 20.42; found: C 45.12, H 2.51, N 19.91.

### 1.3 Synthesis of porous Co $_3$ O $_4$ /N-C

Co $_3$ O $_4$ /N-C composite was synthesized via calcination of the obtained N-rich MOF at 500°C for 2 h in a N $_2$  condition with a slow heating rate of 0.5 °C·min $^{-1}$ . The resulting powder was black in color.

### 1.4 Electrochemical measurements.

The working electrode was fabricated through squeezing a mixture of latex binderbinder

---

(LA132, 15%), Superconductive carbon black, and active materials, which the mixture weight ratio is 10: 20: 70. Then appropriate ethanol was added and stirred for 12h. Lithium was used as the reference and counter electrodes. 1 M LiPF<sub>6</sub> electrolyte dissolved in a mixture, which is composed with dimethyl carbonate (DMC), ethylene carbonate (EC) and ethyl methyl carbonate (EMC) (volume ratio of 1:1:1). The LAND-CT2001A instrument was used to measure the cycle life and electrochemical capacity of the working electrode by the galvanostatic method at the charge and discharge current density of 100 – 5000 mA·g<sup>-1</sup>. The cut-off potential for charge/discharge was set at 0.01 and 3.0 V (vs.Li<sup>+</sup>/Li). All electrochemical measurements were performed at ambient temperature.

## 2. Experiment Results

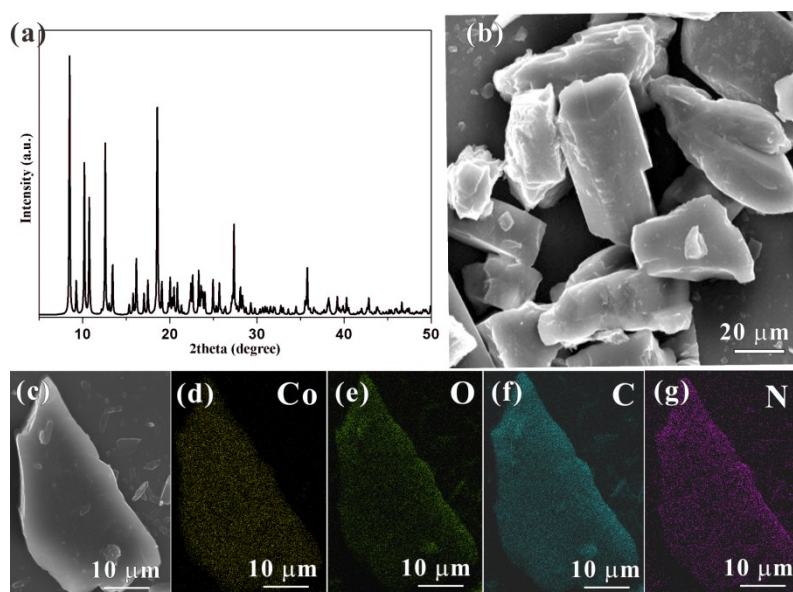

Figure S1. (a) XRD pattern of the N-rich MOF; (b) SEM image of N-rich MOF; (c) SEM image of a typical N-rich MOF structure; (d) Co elemental mapping; (e) O elemental mapping; (f) C elemental mapping; (g) N elemental mapping.

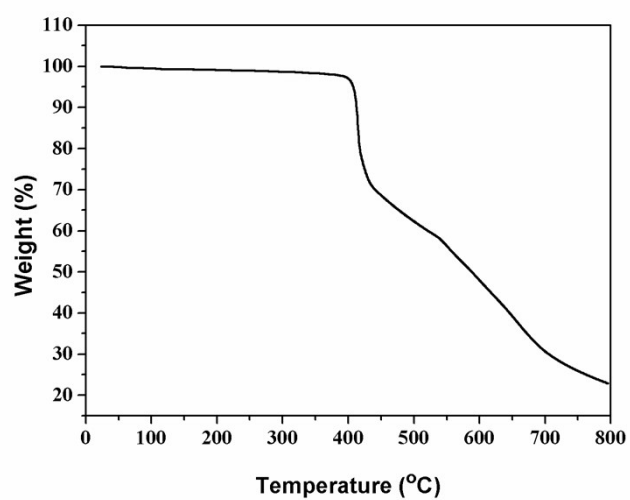

Figure S2. TGA curve of sample, indicating that the sample was decomposed at 400 °C.

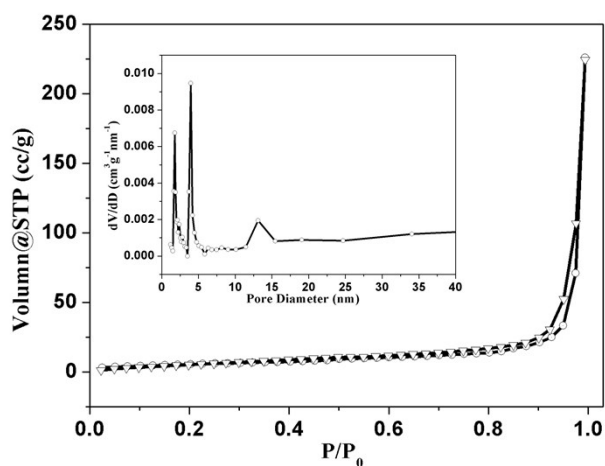

Figure S3.  $N_2$  adsorption–desorption isotherms curves (77 K) of sample, inset is pore size distributions.

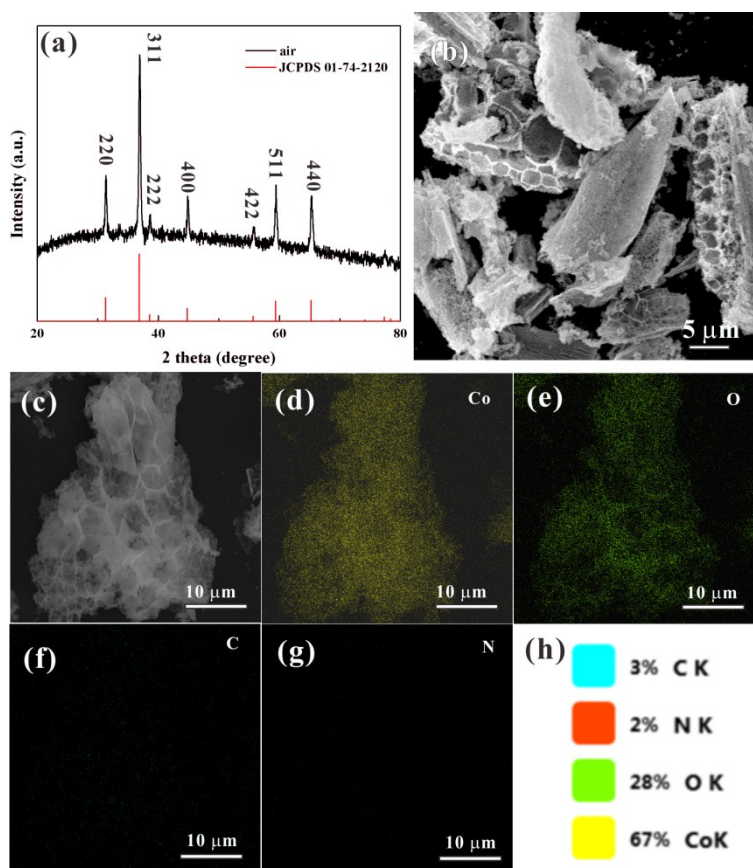

Figure S4. (a) XRD pattern of  $Co_3O_4$  obtained by Co-MOF calcinated in air atmosphere; (b) the corresponding SEM image; (c) SEM image of a typical  $Co_3O_4$  structure; (d) Co elemental mapping; (e) O elemental mapping; (f) C elemental mapping; (g) N elemental mapping; (g) atomic ratios of different elements.

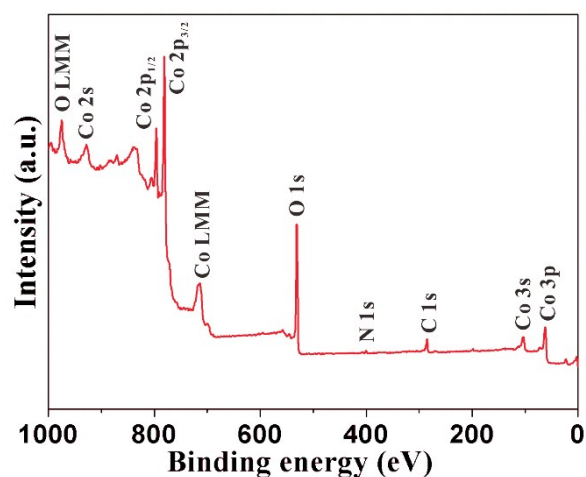

Figure S5. Typical survey scanned XPS spectrum of sample.

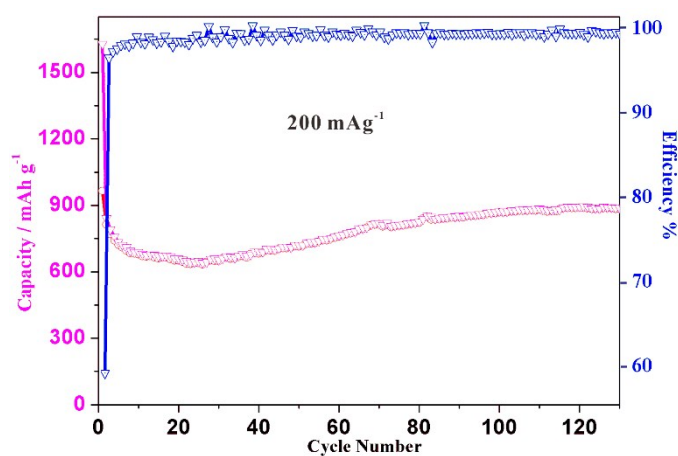

Figure S6. Cycle performance and corresponding coulombic efficiency curves of sample tested at current density of  $200 \text{ mA} \cdot \text{g}^{-1}$ .

Table S1 Comparison of the LIB performance for different electrodes.

| Active material                                          | Charging rate<br>( $\text{mA} \cdot \text{g}^{-1}$ ) | Capacity retention<br>(Capacity in $\text{mAh} \cdot \text{g}^{-1}$ ) | Cycle No |
|----------------------------------------------------------|------------------------------------------------------|-----------------------------------------------------------------------|----------|
| This work                                                | 200                                                  | 883                                                                   | 130      |
| $\text{Co}_3\text{O}_4$ nanowires <sup>[1]</sup>         | 111                                                  | 700                                                                   | 20       |
| $\text{Co}_3\text{O}_4$ cages <sup>[2]</sup>             | 178                                                  | 670                                                                   | 50       |
| $\text{Co}_3\text{O}_4/\text{NRGO}$ <sup>[3]</sup>       | 100                                                  | 910                                                                   | 100      |
| $\text{Co}_3\text{O}_4/\text{GO}$ <sup>[4]</sup>         | 50                                                   | 1004                                                                  | 50       |
| $\text{Co}_3\text{O}_4$ nanoparticles/N-C <sup>[5]</sup> | 100                                                  | 892                                                                   | 100      |

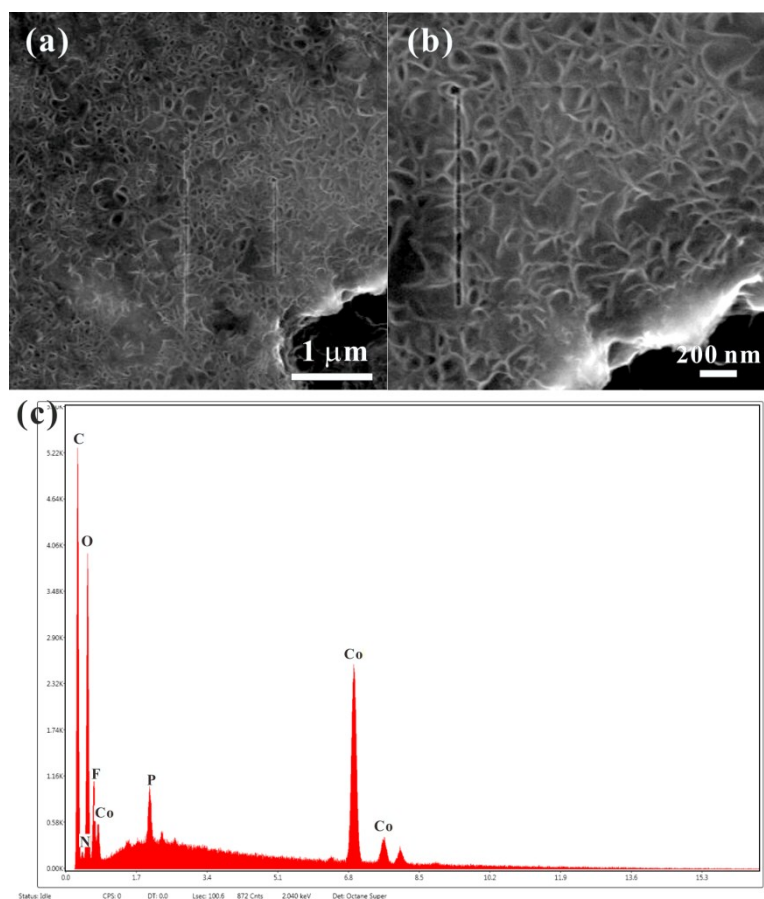

Figure S7. (a-b) SEM image of  $\text{Co}_3\text{O}_4/\text{N-C}$  structure after lithium insertion/extraction process at different magnification; (c) the corresponding EDS spectrum.

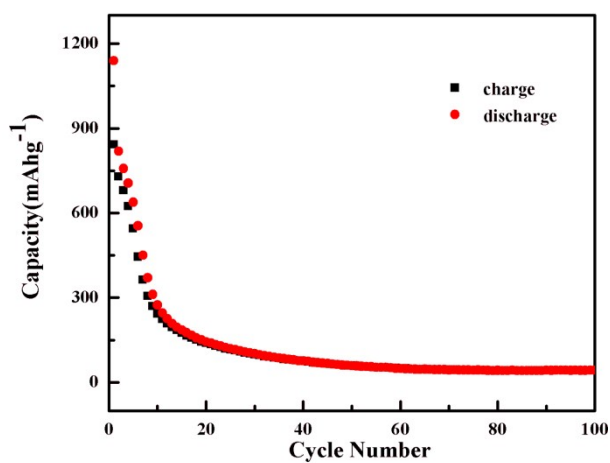

Figure S8. Cycle performance of sample obtained by Co-MOF calcinated in air atmosphere at current density of  $1000\ \text{mA}\cdot\text{g}^{-1}$  between 0.01 and 3 V over 100 cycles.

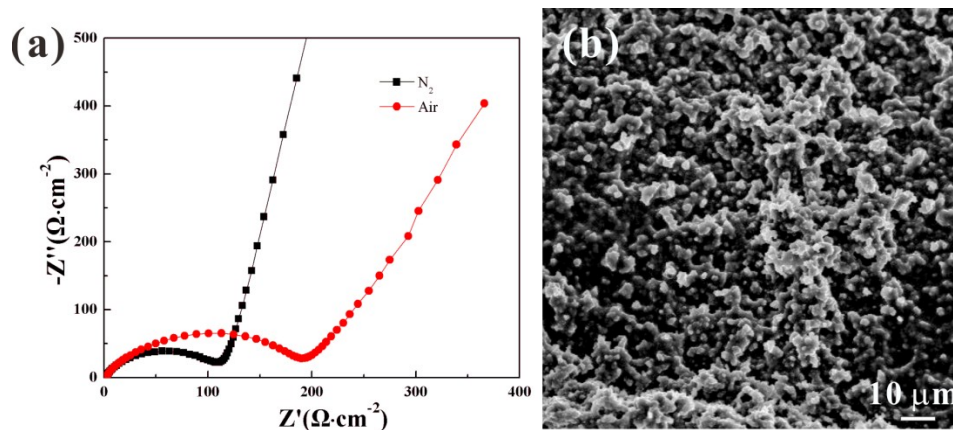

Figure. S9. (a) Impedance spectra of samples obtained by Co-MOF calcinated in nitrogen and air atmosphere; (b) SEM image of sample obtained by Co-MOF calcinated in air atmosphere after lithium insertion/extraction process.

### 3. References:

1. Y. Li, B. Tan, Y. Wu, *Nano Letters*, 2008, **8**, 265-270.
2. X. Wang, L. Yu, X.L. Wu, F. Yuan, Y.G. Guo, Y. Ma, J. Yao, *Journal of Physical Chemistry C*, 2009, **113**, 15553-15558.
3. L. Lai, J. Zhu, Z. Li, D.Y.W. Yu, S. Jiang, X. Cai, Q. Yan, Y.M. Lam, Z. Shen, J. Lin, *Nano Energy*, 2014, **3**, 134-143.
4. B.G. Choi, S.J. Chang, Y.B. Lee, J.S. Bae, H.J. Kim, Y.S. Huh, *Nanoscale*, 2012, **4**, 5924-5930.
5. Y. Hou, J. Y. Li, Z. H. Wen, S. M. Cui, C. Yuan, J. H. Chen, *Nano Energy*, 2015, **12**, 1-8.
